# Supplementary material for: Polyphenol-rich extract of Nelumbo nucifera leaves inhibits alcohol-induced steatohepatitis via reducing hepatic lipid accumulation and anti-inflammation in C57BL/6J mice
Source: Royal Society of Chemistry journal article supplement (doi:10.1039/c3fo60478k), 2014-01-01
Supplement: c3fo60478k.pdf [file c3fo60478k.pdf]

**Table S1.** Composition of experimental diets

|                                                                                                                                                                                                                                                                                                                               | ND       | EtOH      | EtOH +<br>0.5% NLE | EtOH +<br>1.0% NLE | EtOH +<br>2.0% NLE | EtOH +<br>Silymarin |
|-------------------------------------------------------------------------------------------------------------------------------------------------------------------------------------------------------------------------------------------------------------------------------------------------------------------------------|----------|-----------|--------------------|--------------------|--------------------|---------------------|
| Ingredient                                                                                                                                                                                                                                                                                                                    | g/L      | g/L       | g/L                | g/L                | g/L                | g/L                 |
| Casein                                                                                                                                                                                                                                                                                                                        | 41.4     | 41.4      | 41.4               | 41.4               | 41.4               | 41.4                |
| L-Cystine                                                                                                                                                                                                                                                                                                                     | 0.5      | 0.5       | 0.5                | 0.5                | 0.5                | 0.5                 |
| DL-Methionine                                                                                                                                                                                                                                                                                                                 | 0.3      | 0.3       | 0.3                | 0.3                | 0.3                | 0.3                 |
| Corn Oil                                                                                                                                                                                                                                                                                                                      | 8.5      | 8.5       | 8.5                | 8.5                | 8.5                | 8.5                 |
| Olive Oil                                                                                                                                                                                                                                                                                                                     | 28.4     | 28.4      | 28.4               | 28.4               | 28.4               | 28.4                |
| Safflower Oil                                                                                                                                                                                                                                                                                                                 | 2.7      | 2.7       | 2.7                | 2.7                | 2.7                | 2.7                 |
| Maltose                                                                                                                                                                                                                                                                                                                       | 115.2    | 25.6      | 25.6               | 25.6               | 25.6               | 25.6                |
| Dextrin                                                                                                                                                                                                                                                                                                                       |          |           |                    |                    |                    |                     |
| Cellulose                                                                                                                                                                                                                                                                                                                     | 10       | 10        | 10                 | 10                 | 10                 | 10                  |
| Mineral Mix                                                                                                                                                                                                                                                                                                                   | 8.75     | 8.75      | 8.75               | 8.75               | 8.75               | 8.75                |
| Vitamin Mix                                                                                                                                                                                                                                                                                                                   | 2.5      | 2.5       | 2.5                | 2.5                | 2.5                | 2.5                 |
| Choline Bitartrate                                                                                                                                                                                                                                                                                                            | 0.53     | 0.53      | 0.53               | 0.53               | 0.53               | 0.53                |
| Xanthan Gum                                                                                                                                                                                                                                                                                                                   | 3        | 3         | 3                  | 3                  | 3                  | 3                   |
| Total                                                                                                                                                                                                                                                                                                                         | 221.78   | 132.18    | 132.18             | 132.18             | 132.18             | 132.18              |
| Ethanol(ml/L)                                                                                                                                                                                                                                                                                                                 | 0        | 67        | 67                 | 67                 | 67                 | 67                  |
| Grand total<br>(kcal/L)                                                                                                                                                                                                                                                                                                       | 999.8465 | 1000.2805 | 1000.2805          | 1000.2805          | 1000.2805          | 1000.2805           |
| <p>This control diet contains 1.0 Kcal/ml, of which 35% are fat derived, 47% are derived from carbohydrate, and 18% are derived from protein.</p> <p>This ethanol diet contains 1.0 Kcal/ml, of which 35% are fat derived, 11% derived from carbohydrate, 18% are derived from protein, and 36% are derived from ethanol.</p> |          |           |                    |                    |                    |                     |
